# Supplementary material for: What the textbooks don’t teach about the reality of running a digitally enabled health study: a qualitative interview study
Source: Research Square preprint supplement (doi:10.21203/rs.3.rs-4016438/v1), 2024-03-13
Supplement: Supplementary file 1 [file 1a0140f7baa8b378ca2a3566.docx]

Additional File 2

# Invitation to participate in the analysis of mobile health study administration

We at the Norwegian Centre for E-Health Research are conducting a project funded by Helse Nord to compare study-administration approaches. In other words, how we as researchers manage the different stages of a study.

All researchers have experienced delays in our studies, whether it be because recruitment took too long or there was miscommunication on who within the research team was supposed to do which task. It turns out that more than 80% of health research studies are not completed on time or within budget. We are usually not given the time to systematically reflect on what went right or wrong and how we can learn from it. So, we applied for funding to take the time to understand, for mHealth and digital intervention studies, why this might be by comparing which resources were used administering the projects, who was involved in their experiences.

You are being asked to participate in an interview study because of your experience as a researcher in digital health studies. The interview includes questions about which resources were used, who was involved in running the study and how the study progressed from recruitment to data analysis and dissemination. As human factors are just as important to the success of a study as which technology was used, we are also interested in interpersonal relations within the team and your experiences and motivations as a researcher during the study.

## How your data will be handled

These are audio recorded and transcribed. We store the audio recordings and transcriptions on a password protected USB drive in a locked office at the Norwegian Centre for E-health Research in Tromsø, Norway, which also requires a keycard to enter. Personally identifiable details of you and/or colleagues mentioned, and those that would identify the study, are removed during analysis. Because we aim for honest and candid feedback, no specifics about the project or names will be included in any dissemination. We will keep the audio recordings and transcripts for no more than 5 years after the study-end.

Your rights as a participant

Participation is voluntary and you have the right to withdraw consent or information shared during your interview. Simple inquire with the interviewer (Meghan Bradway – project contact). If you are comfortable with these terms and wish to participate, you must sign the informed consent portion of this document.

If you have any questions, please contact the project contact or project coordinator listed under the “Contant information” section below.

You can also contact the Data Protection Officer of if you have any questions related to the use of your personal data in the research project: Personvernombudet@unn.no.

Approval

The project has been reviewed by the Regional Committee for Medical and Health Research Ethics (North) (Ref.: 625936)

In accordance with the General Data Protection Regulation (Personal Data Protection Ordinance article 6 no. 1 letter a) the Project Coordinator – the University Hospital of North Norway, department of Norwegian Centre for E-health Research is independently responsible to ensure that the processing of your personal data has a legal basis.

You have the right to submit a complaint on the processing of your personal health data to the Norwegian Data Inspectorate (Datatilsynet).

Contact information

If you have any questions regarding the research project, you can contact Meghan Bradway or Eirik Årsand.

**Project contact:**

Meghan Corin Bradway

Email: [Meghan.bradway@ehealthresearch.no](mailto:Meghan.bradway@ehealthresearch.no)

Mobile number: +47 911 93 393

**Project coordinator:**

Eirik Årsand

Email: Eirik.Arsand@ehealthresearch.no

Telephone number: +47 992 43 592

# I consent to participating in the research project and that my personal data concerning study administration experience can be used as described above.

**Participant:**

| Name of the Participant | | |
| --- | --- | --- |
| City and date |  | Signature of the Participant (e-signatures are acceptable) |

Meghan Bradway, PhD

Norwegian Centre For E-Health Research

University Hospital of North Norway
