# Supplementary material for: What the textbooks don’t teach about the reality of running a digitally enabled health study: a qualitative interview study
Source: Research Square preprint supplement (doi:10.21203/rs.3.rs-4016438/v1), 2024-03-13
Supplement: Supplementary file 2 [file ea26bd836094380f12796d30.docx]

# Additional File 4

## Results

### Themes and paper structure


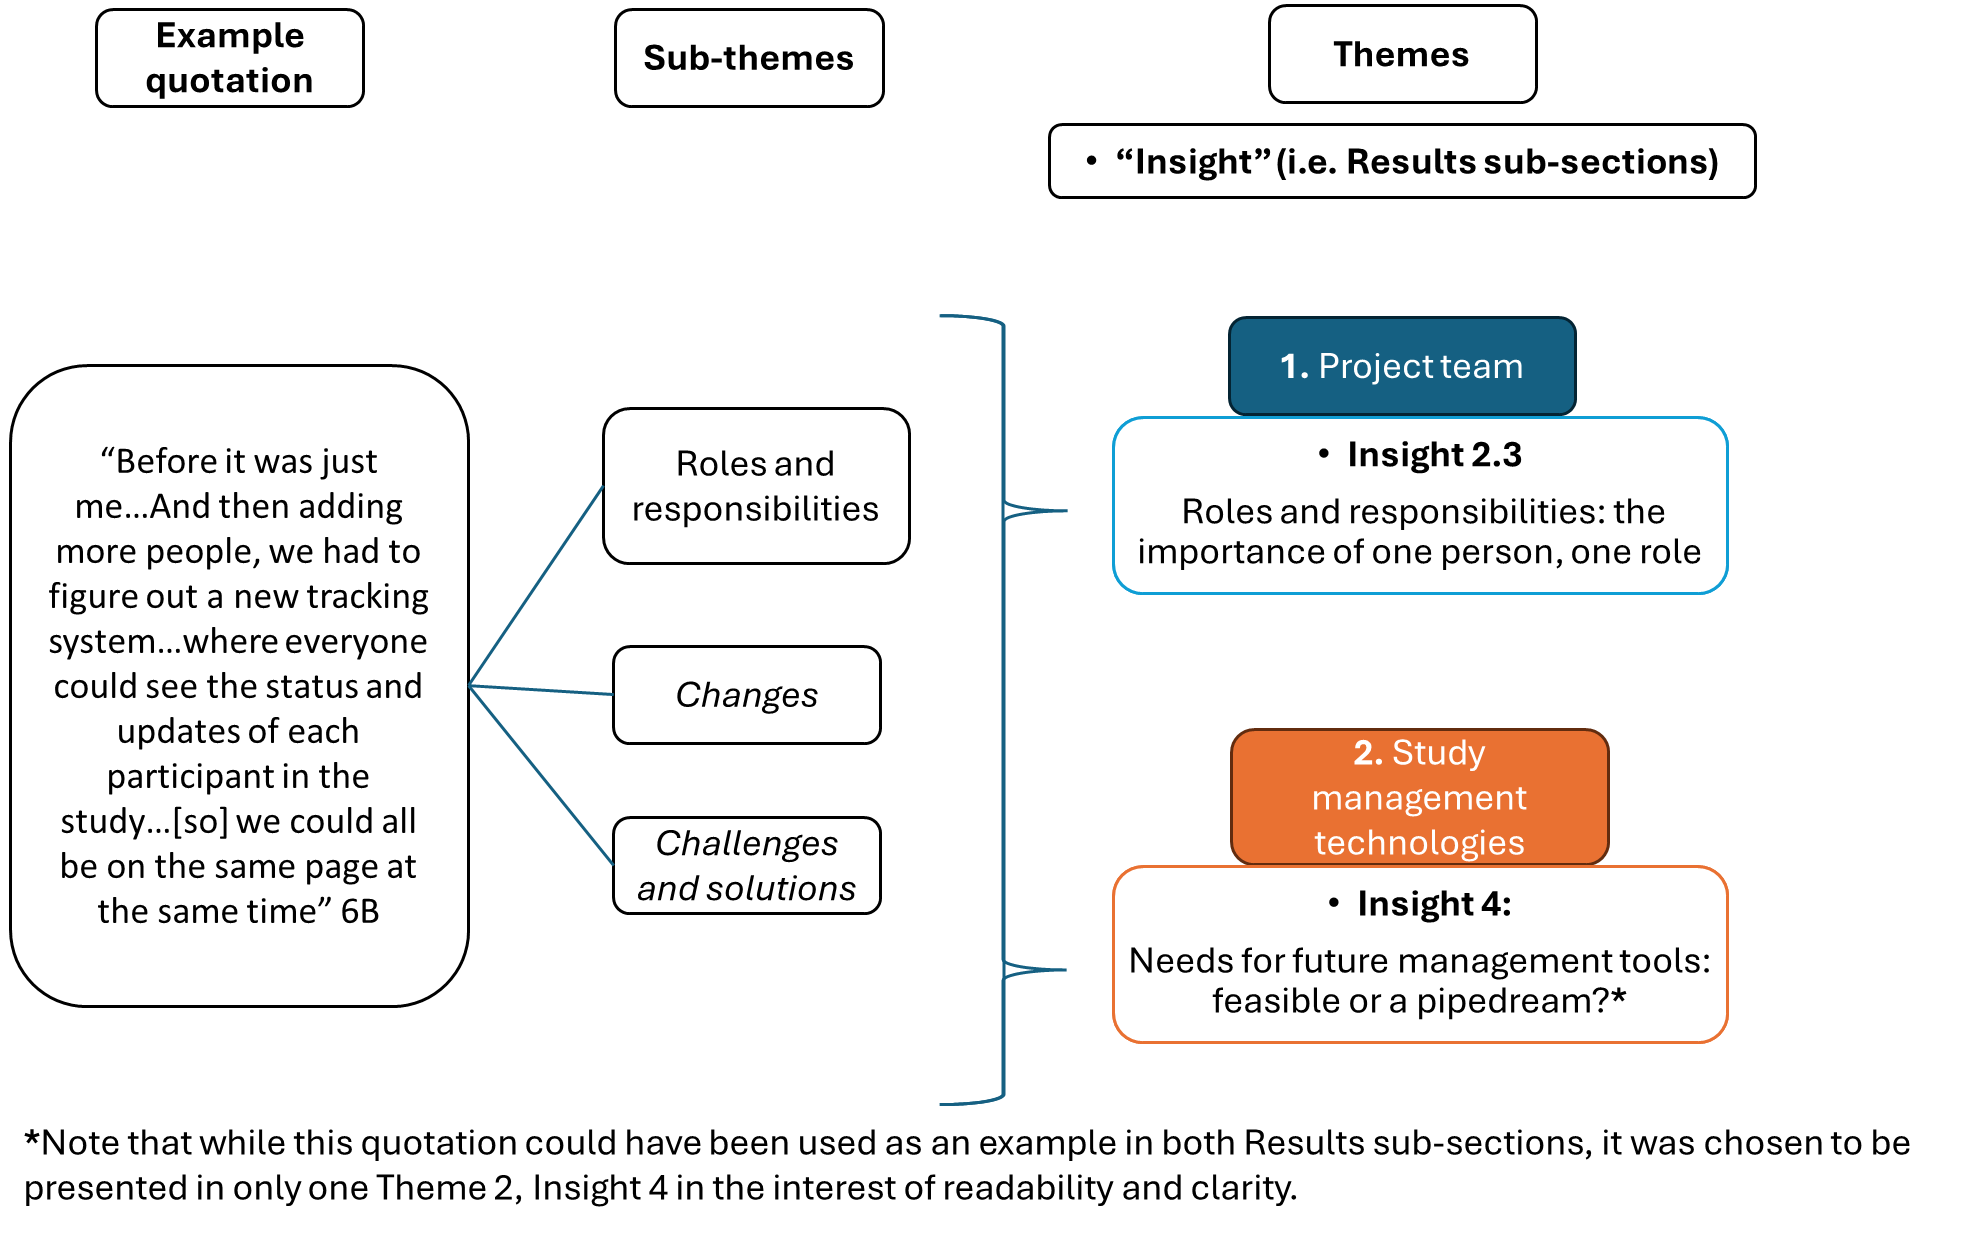


**Figure 1.** Illustration of how themes and sub-themes were combined to form “Insights”, i.e. the Results sub-sections.
